# Supplementary material
Source: PubMed Central journal article supplement (PMC6329660)

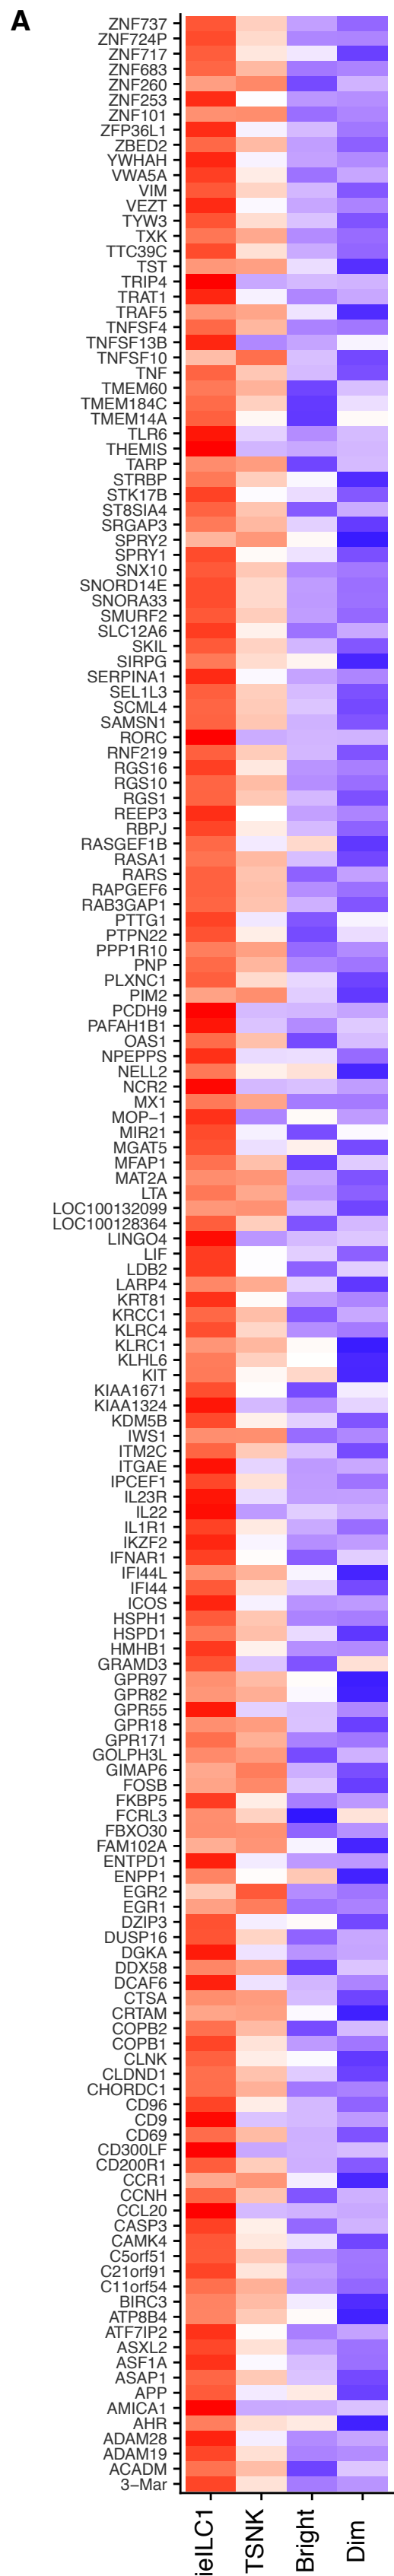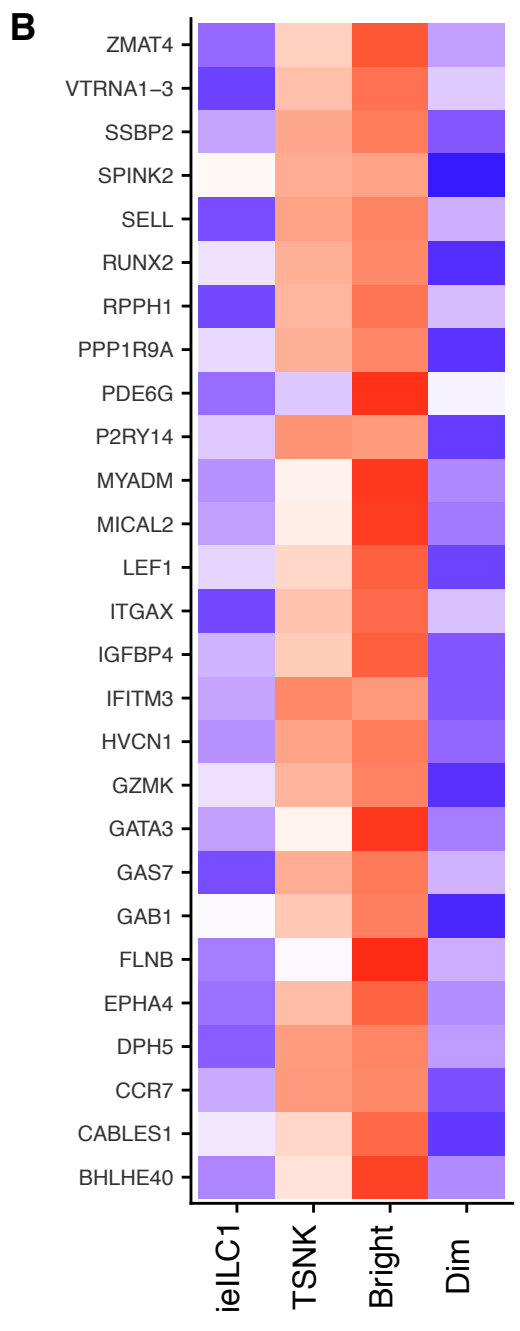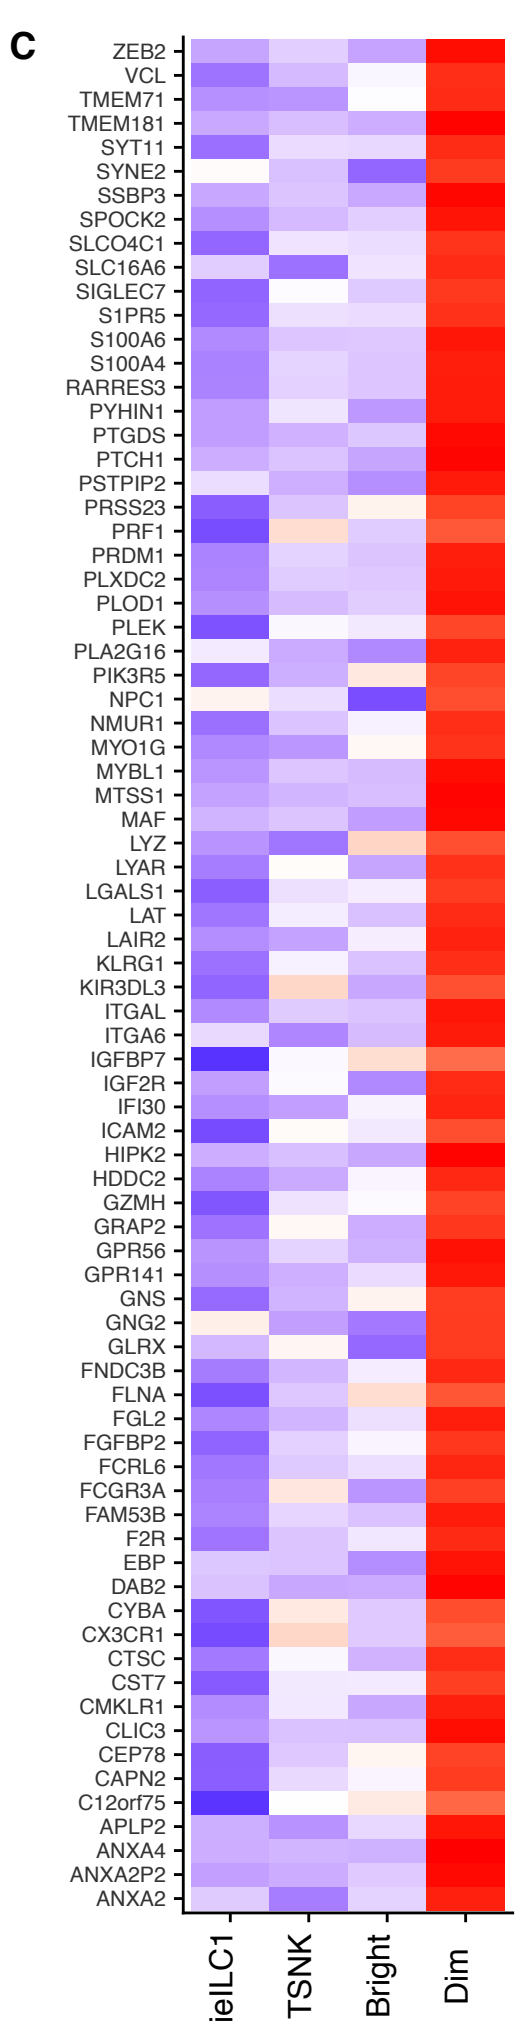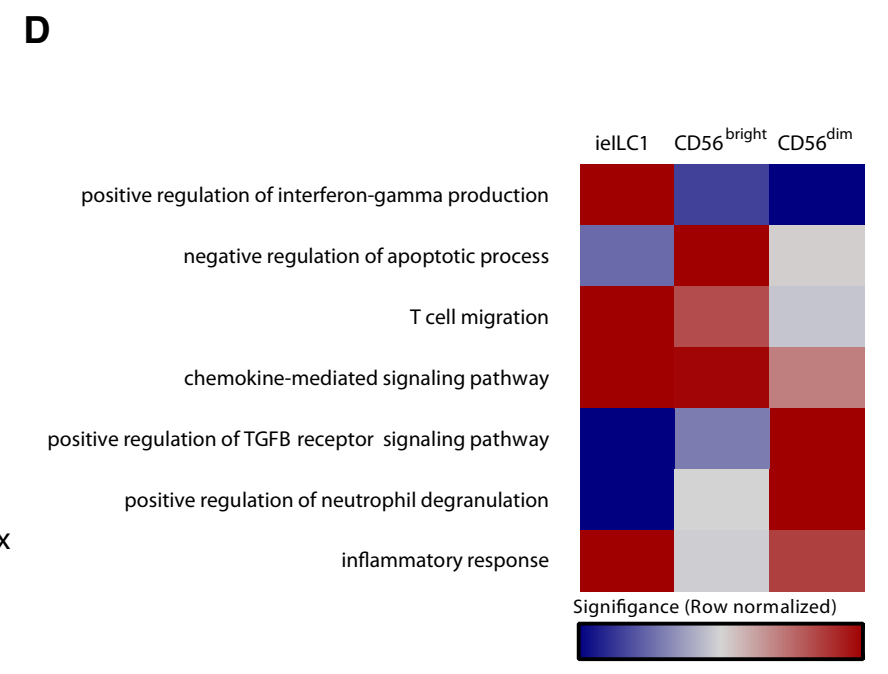

Supplement: NIHMS1515767-supplement-1.pdf [file NIHMS1515767-supplement-1.pdf]

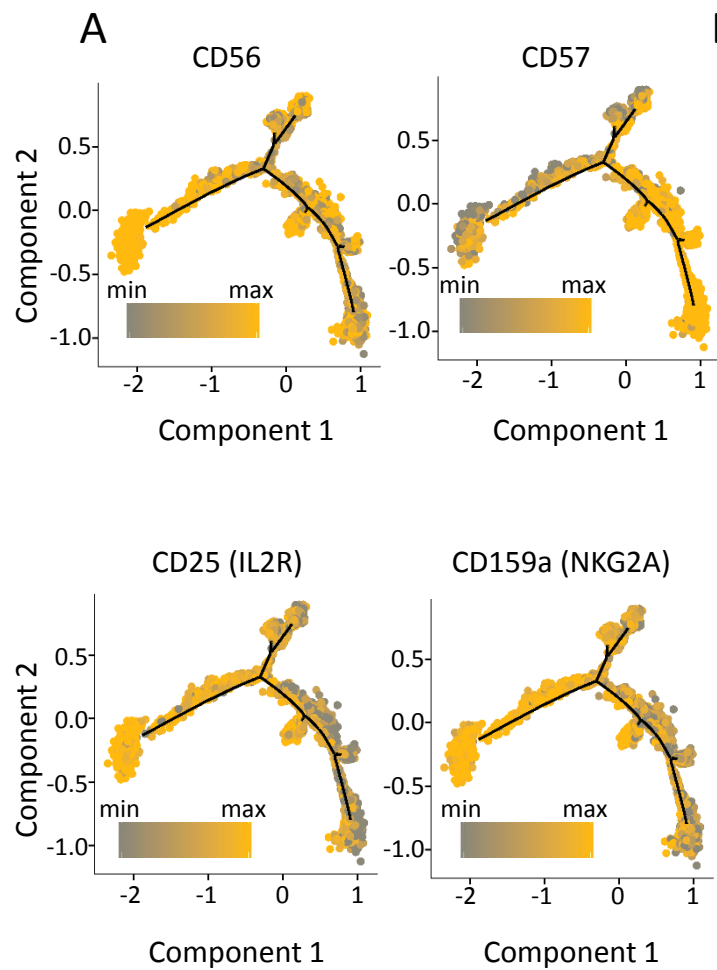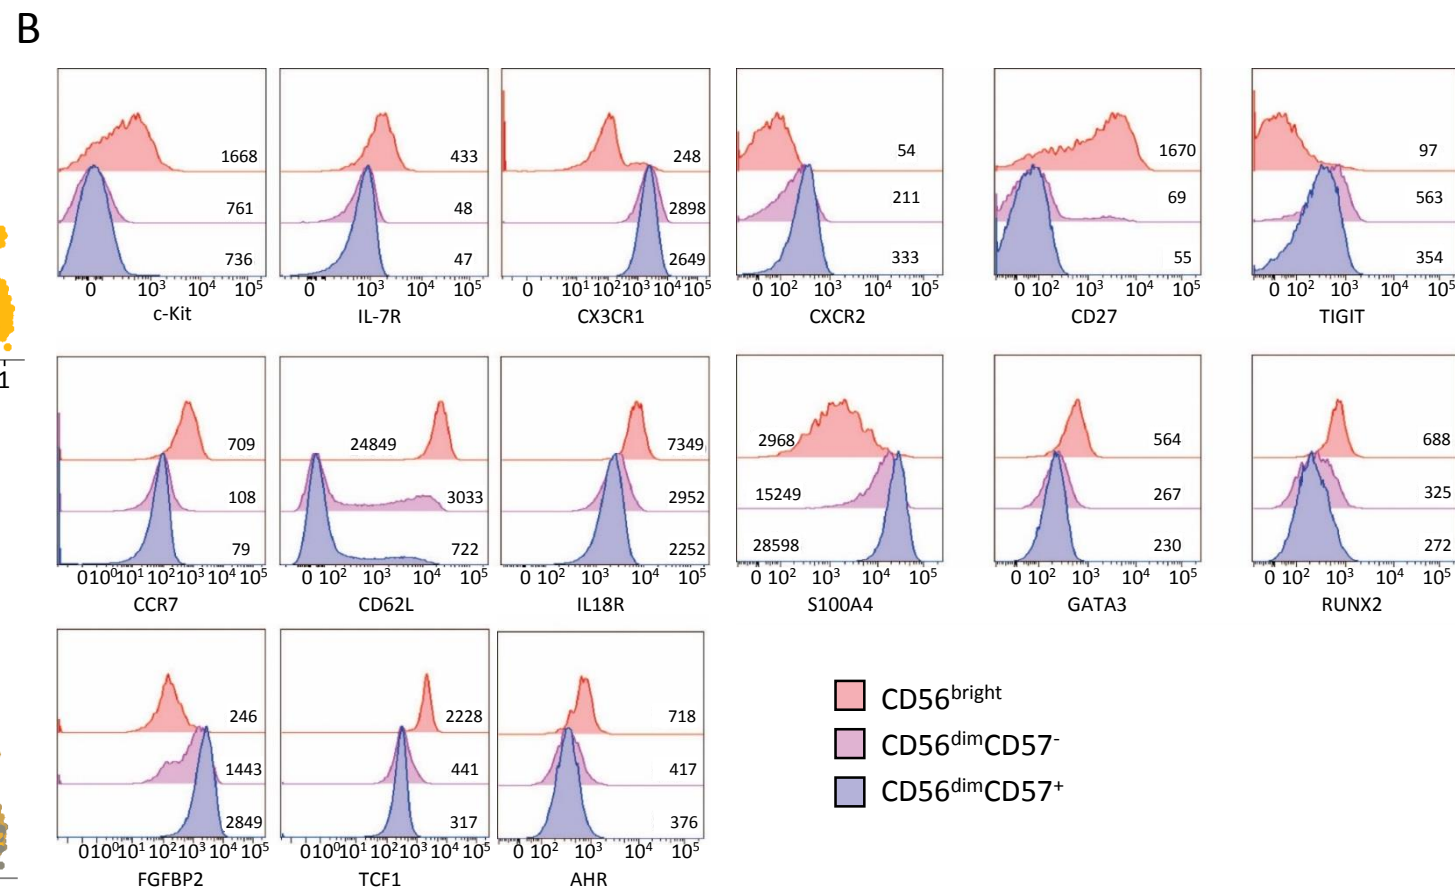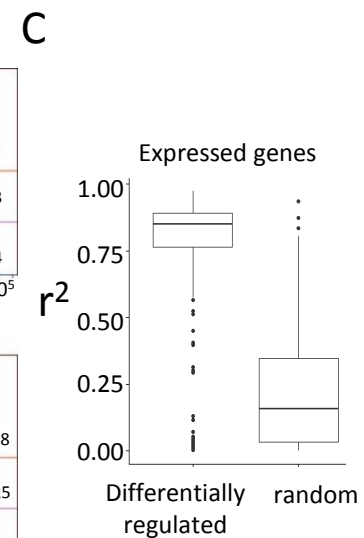

Supplement: NIHMS1515767-supplement-2.pdf [file NIHMS1515767-supplement-2.pdf]

A

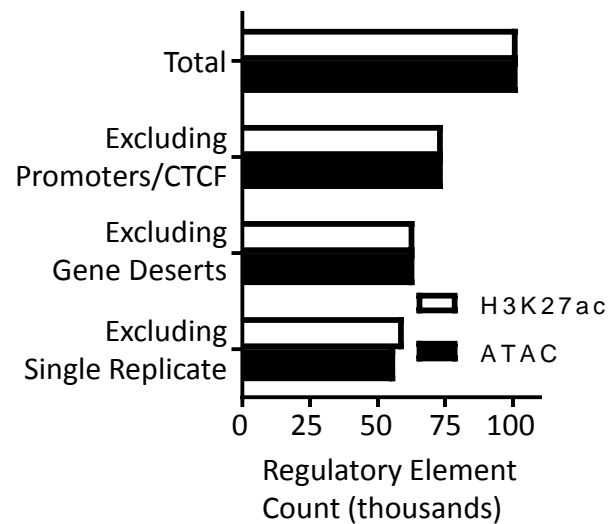

B

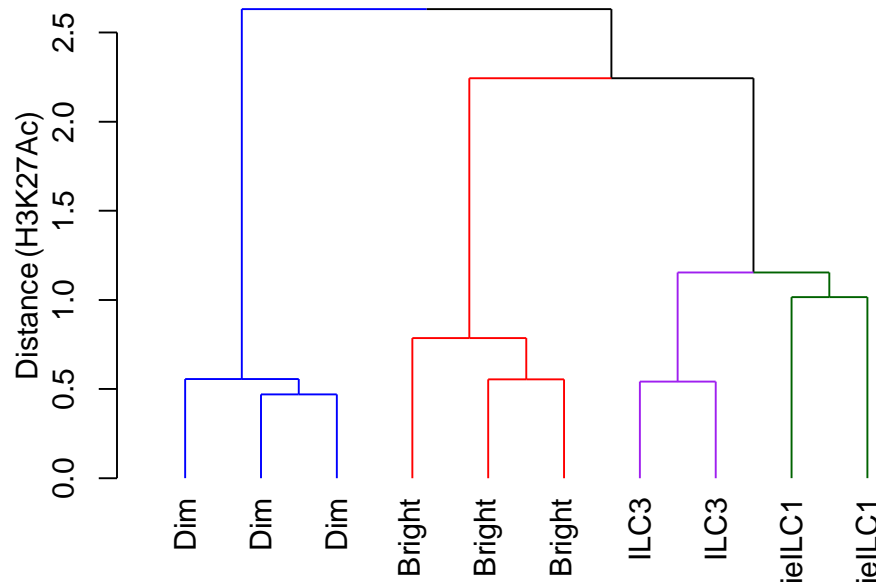

C

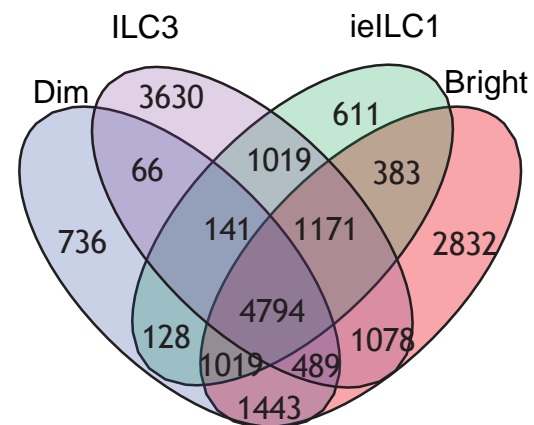

D

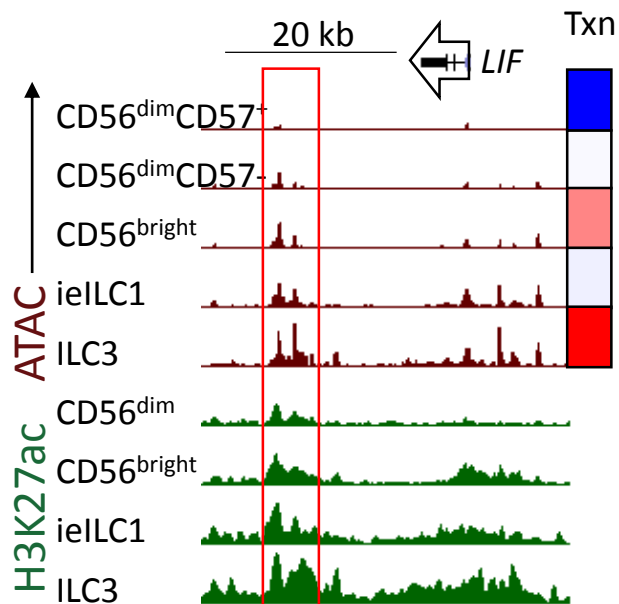

E

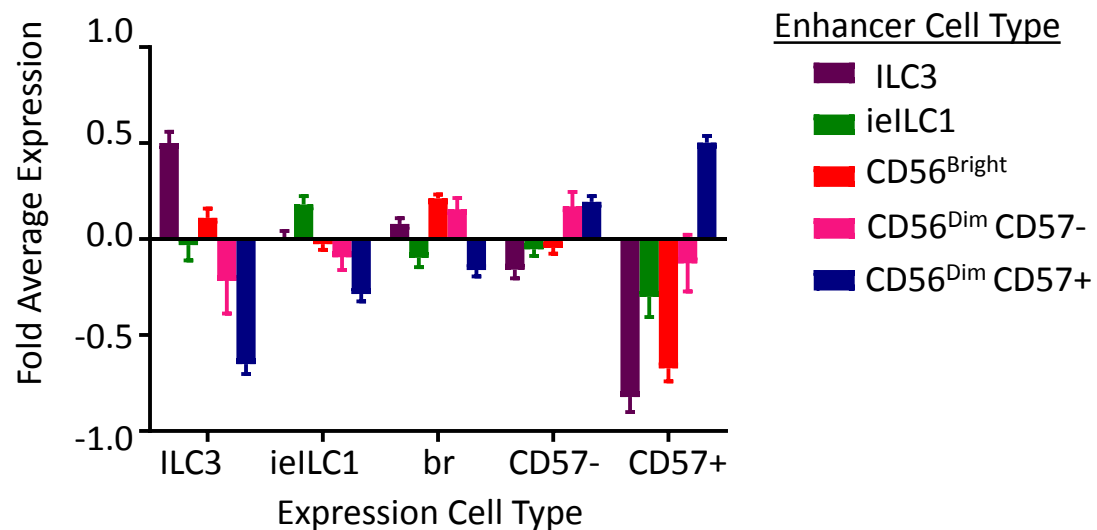

Supplement: NIHMS1515767-supplement-3.pdf [file NIHMS1515767-supplement-3.pdf]

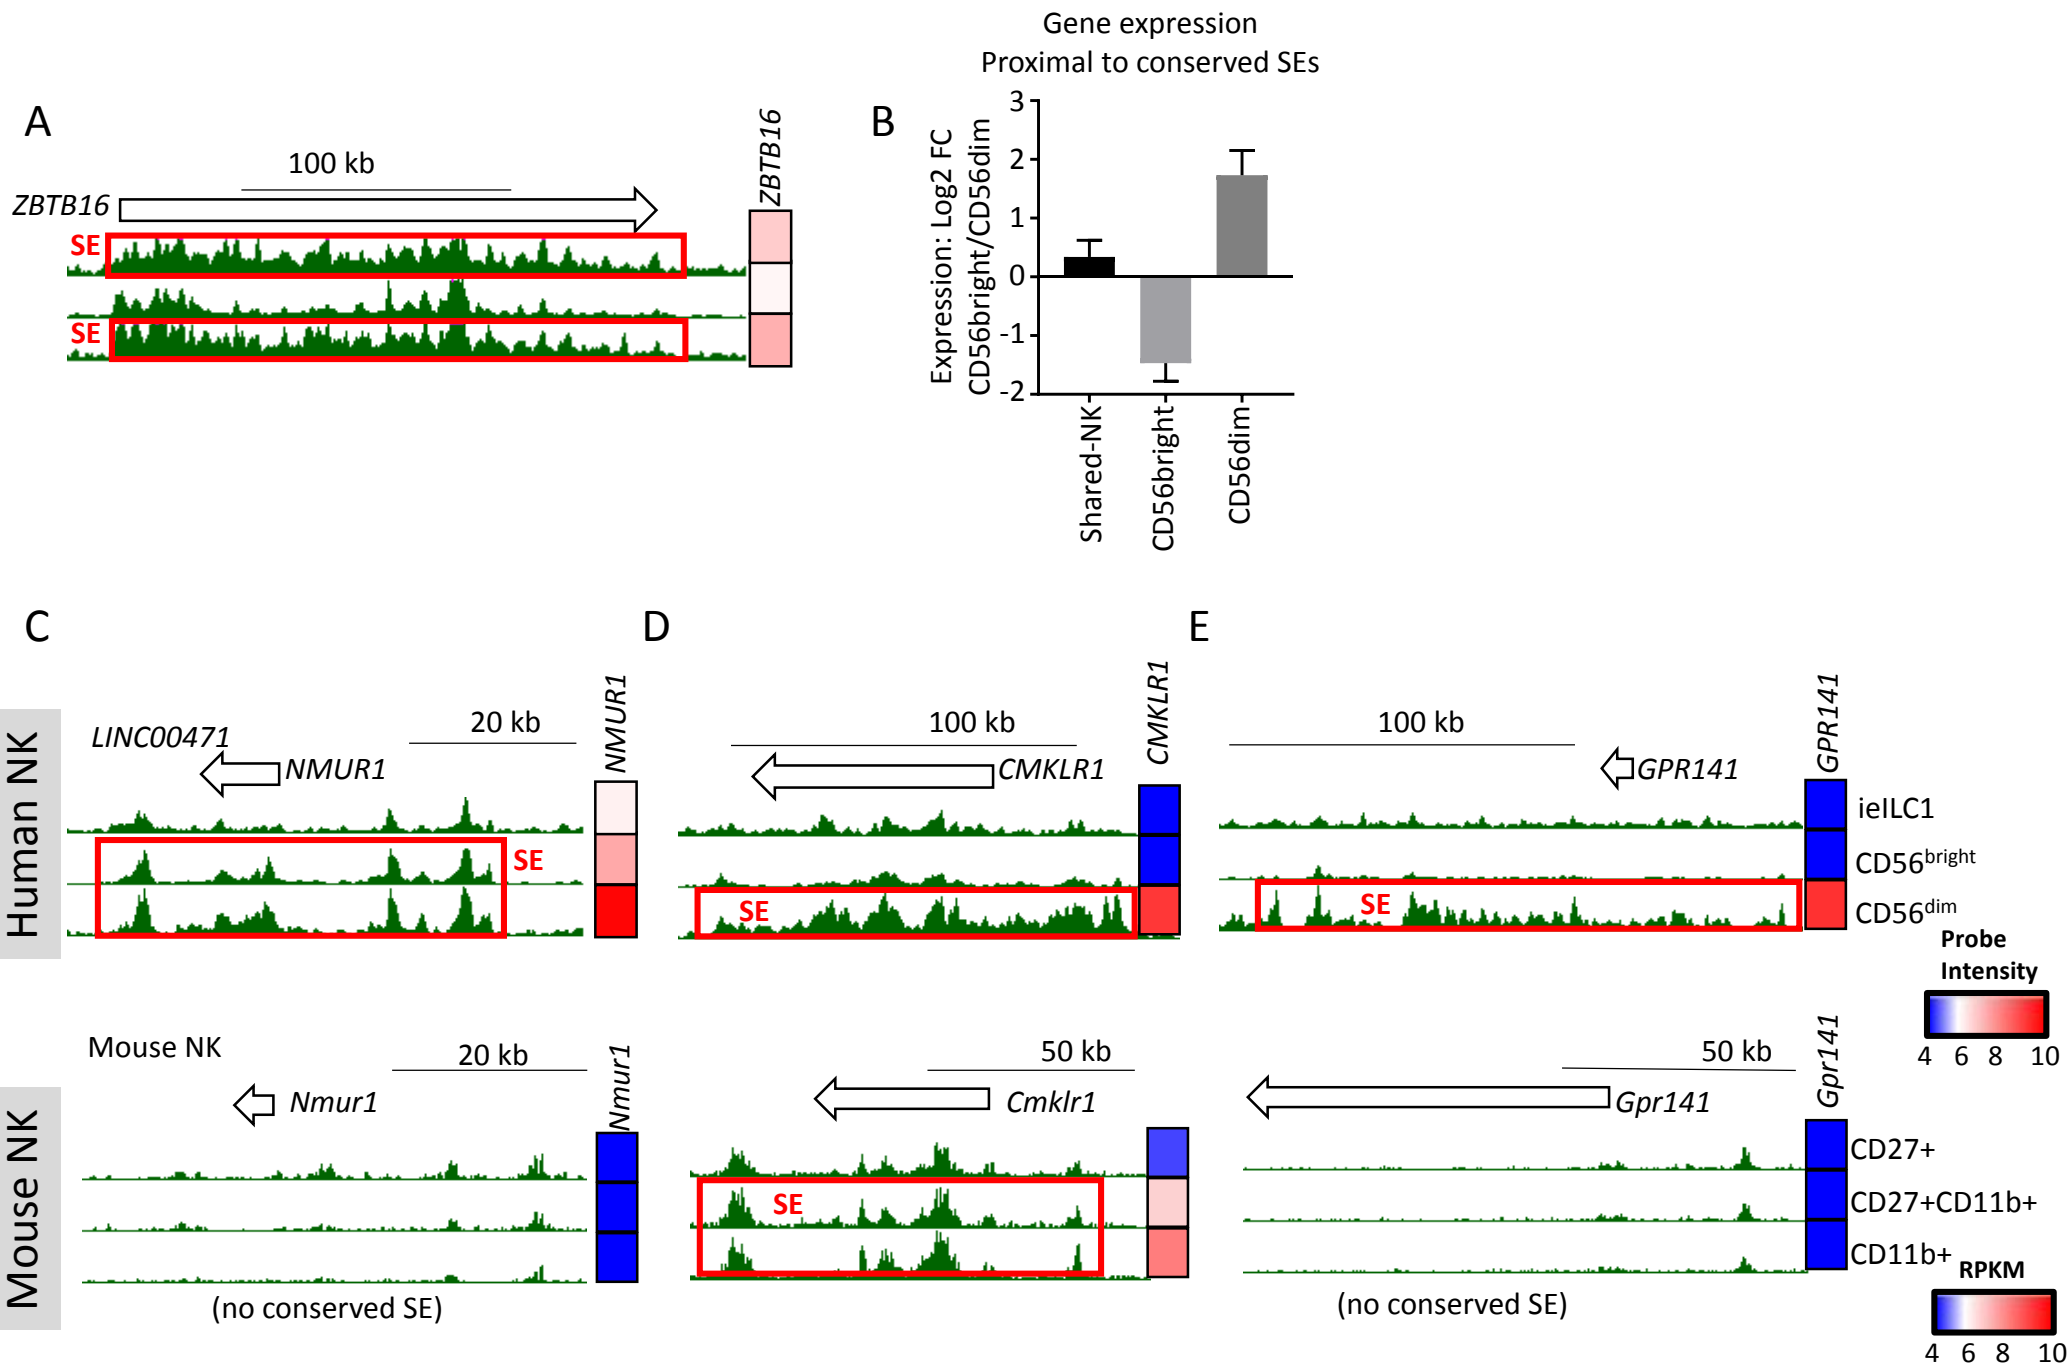

Supplement: NIHMS1515767-supplement-4.pdf [file NIHMS1515767-supplement-4.pdf]

**A**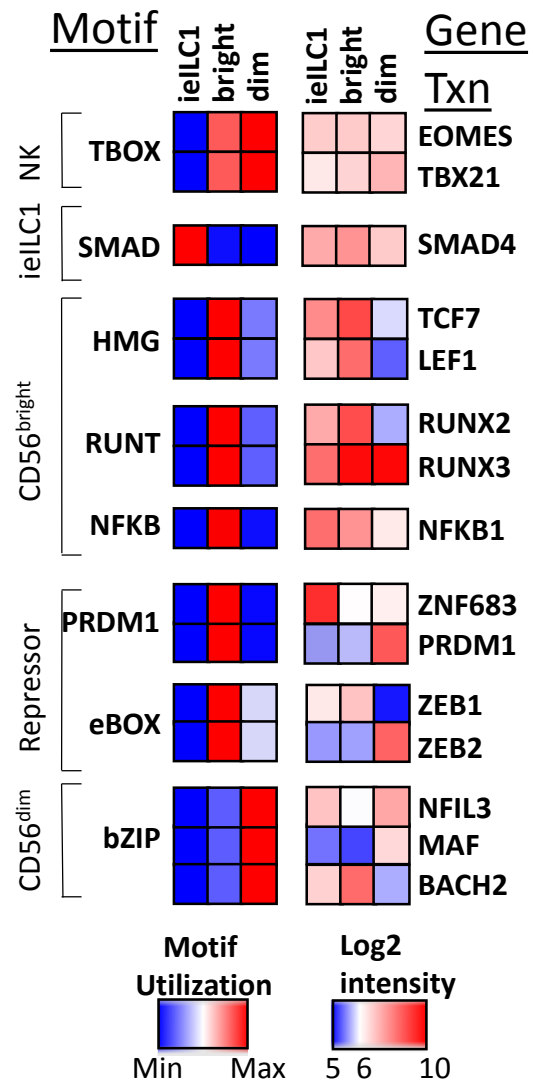**B**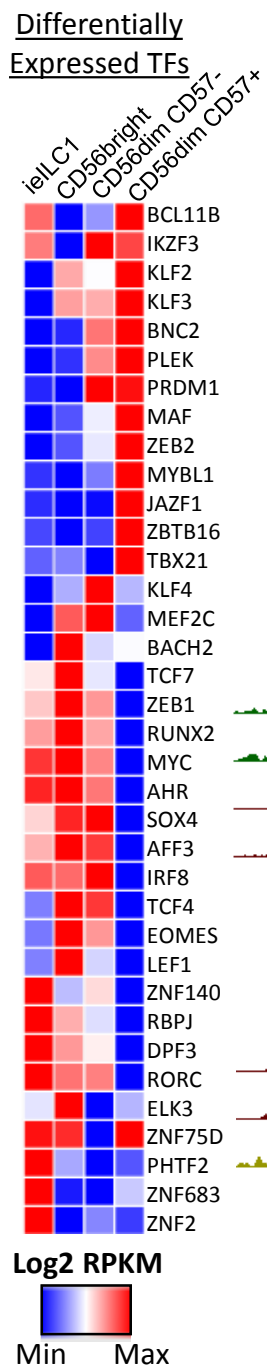**C**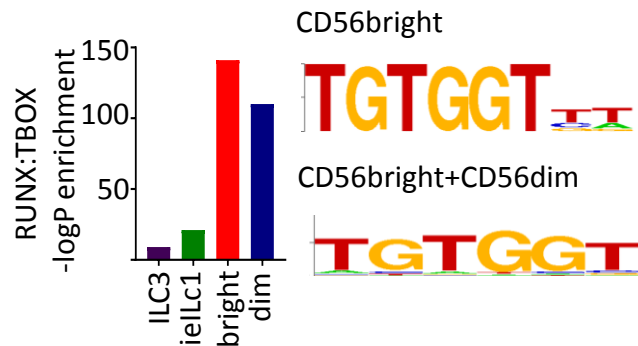**E**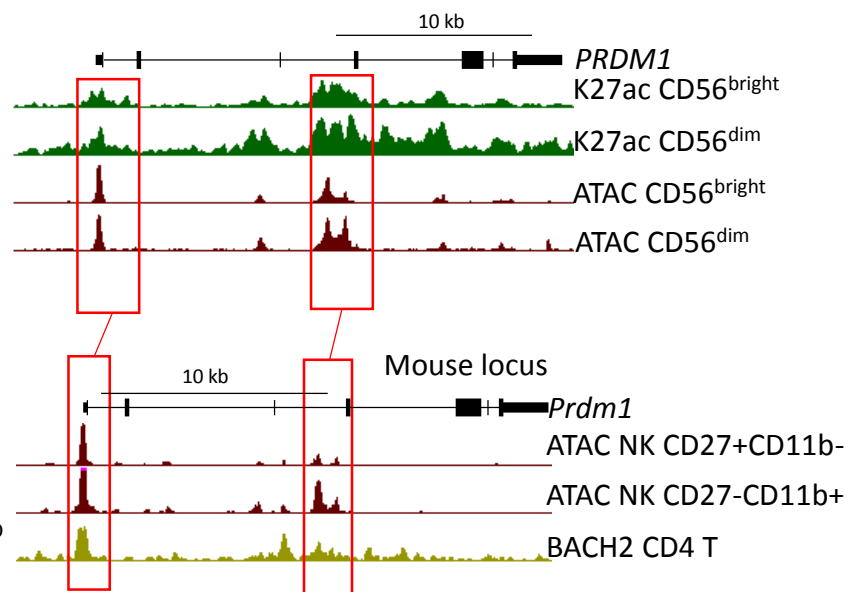**D**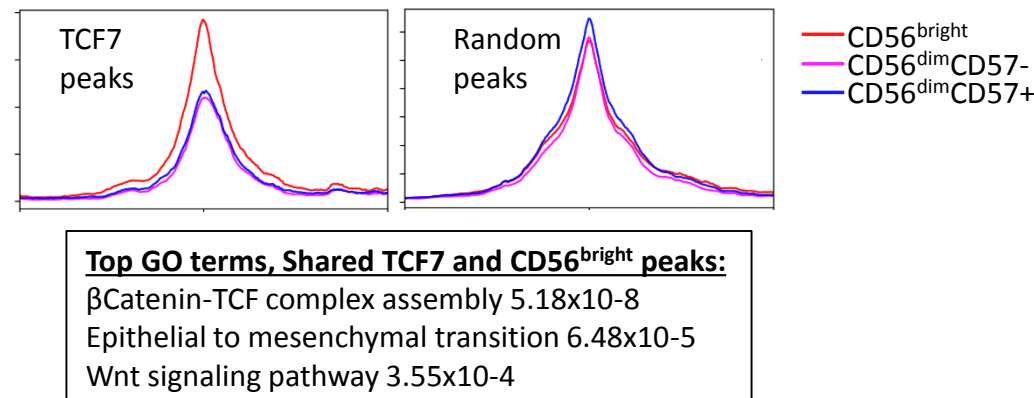**F**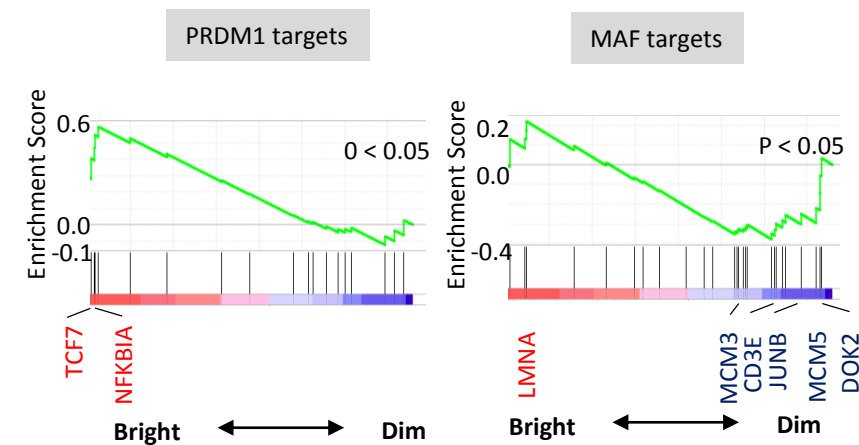

Supplement: NIHMS1515767-supplement-5.pdf [file NIHMS1515767-supplement-5.pdf]

A

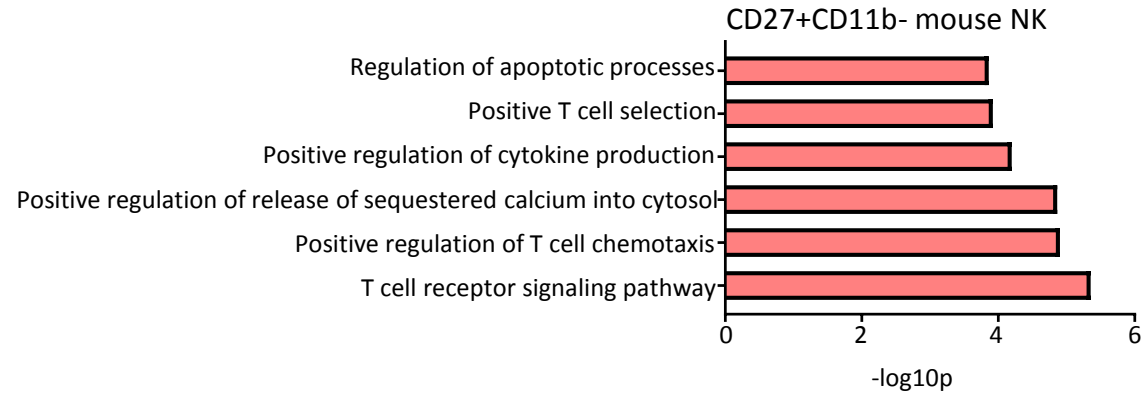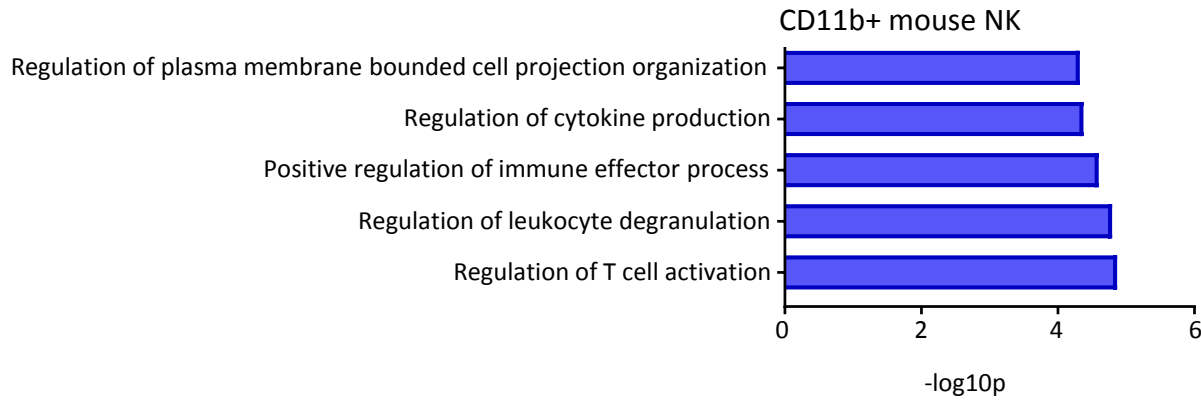

B

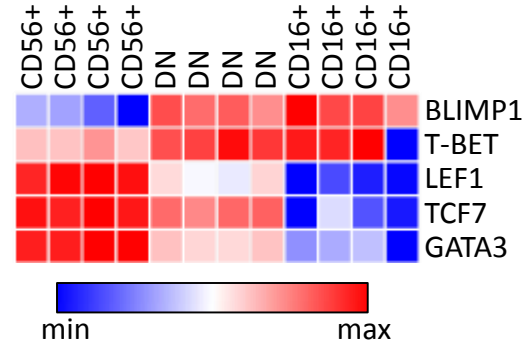

C

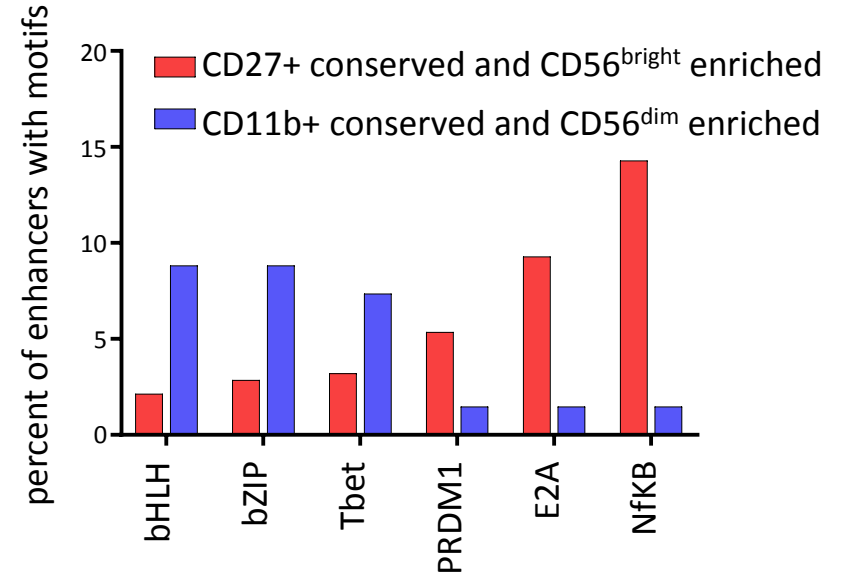

Supplement: NIHMS1515767-supplement-6.pdf [file NIHMS1515767-supplement-6.pdf]
